# Supplementary material
Source: PubMed Central journal article supplement (PMC2575184)

E08-05-0530 Ikenouchi

**Supplementary Figure 1 GFP-tagged tricellulin is not concentrated at cell-cell contacts in L cell transfectants**

Immunofluorescence staining of stable L cell transfectants expressing GFP-tagged tricellulin (left) or GFP only (right) with anti-GFP mAb (green). GFP-tagged tricellulin was efficiently recruited to the plasma membrane, however, it was not concentrated at cell-cell contacts in L cell transfectants. Bar, 10  $\mu$ m

**Supplementary Figure 2 Freeze-fracture images of cell contact planes of Cld1 L cells and Cld1-Tri L cells.**

Freeze-fracture images of cell contact planes of Cld1 L cells (left) and Cld1-Tri L cells (right). These images were used for the measurement of the mean length of TJ strands between cross-points shown in Figure 1D. Bars, 495nm

**GFP-tricellulin**

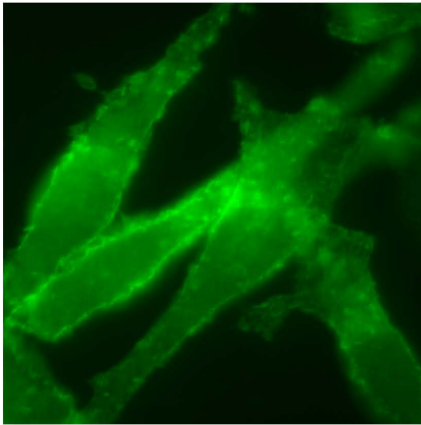

**GFP**

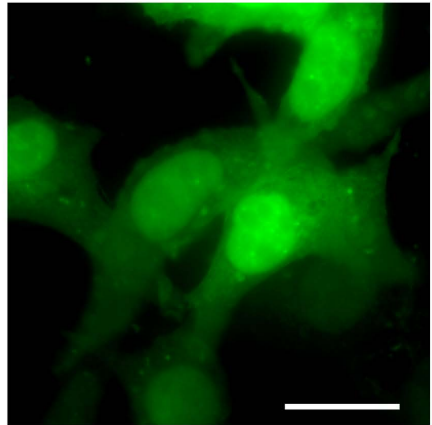

**Cld1 L**

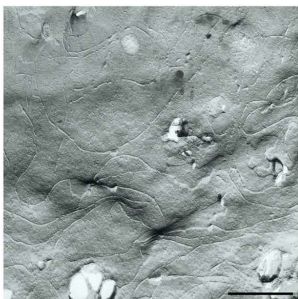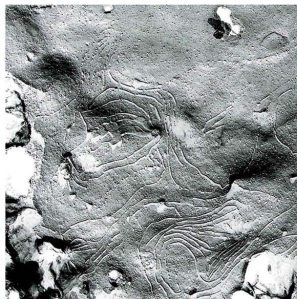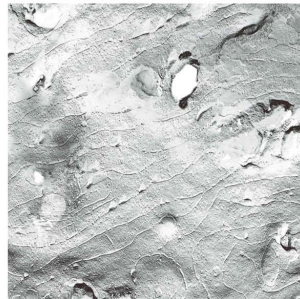

**Cld1-Tri L**

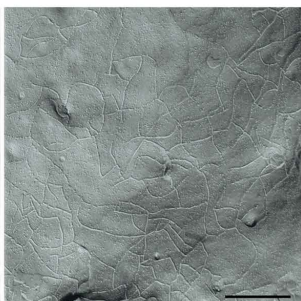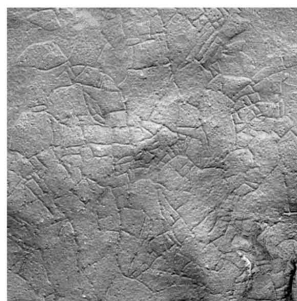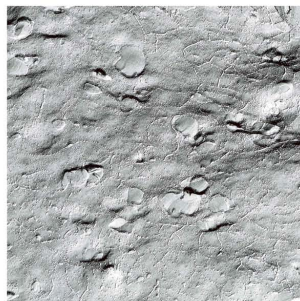

Supplement: E08-05-0530_1.pdf [file E08-05-0530_1.pdf]
